# Supplementary material
Source: publisher figshare collection journal article supplement (https://frontiersin.figshare.com/ndownloader/files/15152822)
Supplement: Supplementary file [file 15152822]

**Supplementary Material** ×

| File Name                                                                                            |                                                                                   |
|------------------------------------------------------------------------------------------------------|-----------------------------------------------------------------------------------|
|  Table 1.XLSX       |  |
|  Data Sheet 1.FASTA |  |
|  Data Sheet 2.FASTA |  |
|  Image 1.TIF        |  |
|  Image 2.TIF        |  |
|  Image 3.TIF        |  |

Close

Table 1 should be labeled as Table S1

Data Sheet 1 should be labeled Data S1

Data Sheet 2 should be labeled Data S2

Image 1 should be labeled as supplementary Figure 1

Image 2 should be labeled as supplementary Data 1 and updated

Image 3 should be labeled as supplementary Data 2 and updated
